# Supplementary material for: Efficient Analysis of Small Molecules via Laser Desorption/Ionization Time-of-Flight Mass Spectrometry (LDI–TOF MS) Using Gold Nanoshells with Nanogaps
Source: MDPI journal article supplement (doi:10.3390/nano14010025), 2023-12-21
Supplement: s1 [file s1]

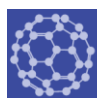

## Supplementary Materials

# Efficient Analysis of Small Molecules via Laser Desorption/Ionization Time-of-Flight Mass Spectrometry (LDI-TOF MS) Using Gold Nanoshells with Nanogaps

Noori Kim <sup>1,†</sup>, Yoon-Hee Kim <sup>1,†</sup>, Gaon Jo <sup>1</sup>, Jin Yoo <sup>1</sup>, Seung-min Park <sup>2</sup>, Bong-Hyun Jun <sup>1,\*</sup> and Woon-Seok Yeo <sup>1,\*</sup>

<sup>1</sup> Department of Bioscience and Biotechnology, Konkuk University, Seoul 05029, Republic of Korea; bobbysen@naver.com (N.K.); yoonhees@konkuk.ac.kr (Y.-H.K.); jogaon883@gmail.com (G.J.); jin4261624@gmail.com (J.Y.)

<sup>2</sup> School of Chemistry, Chemical Engineering and Biotechnology, Nanyang Technological University, Singapore 639798, park.seungmin@ntu.edu.sg

<sup>†</sup> These authors contributed equally to this work.

\* Correspondence: bjun@konkuk.ac.kr (B.-H.J.); wsyeo@konkuk.ac.kr (W.-S.Y.)

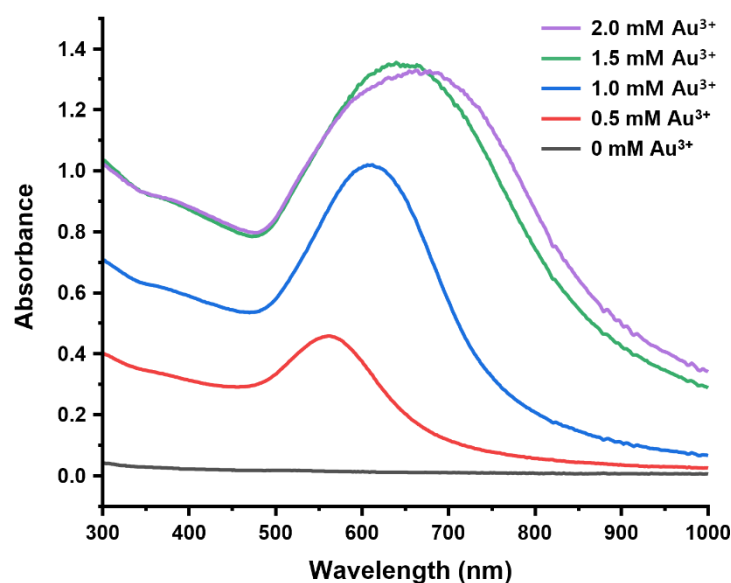

**Figure S1.** Absorption spectra of SiO<sub>2</sub>@Au NGS prepared with different concentration of gold precursor (0, 0.5, 1.0, 1.5, and 2.0 mM Au<sup>3+</sup>).

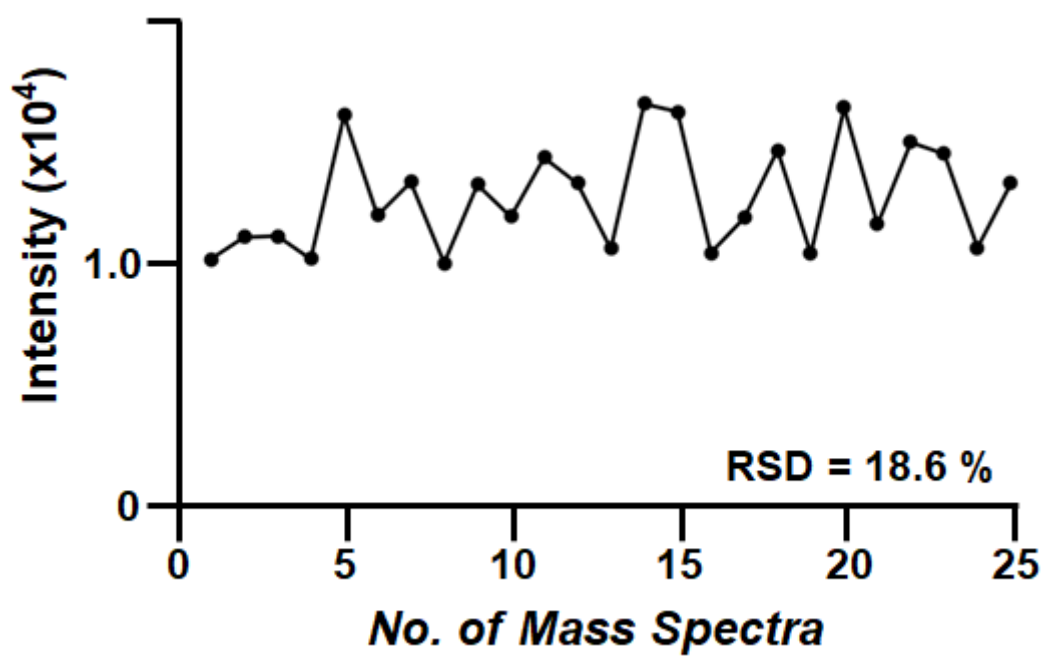

**Figure S2.** Signal variation of cellobiose. The spectra were obtained from 25 different sample spots using SiO<sub>2</sub>@Au NGS<sub>2.0</sub>. The solution of cellobiose (100  $\mu$ M) was serial diluted with SiO<sub>2</sub>@Au NGS<sub>2.0</sub> to become 100 pmole in 1  $\mu$ L on the target plate.

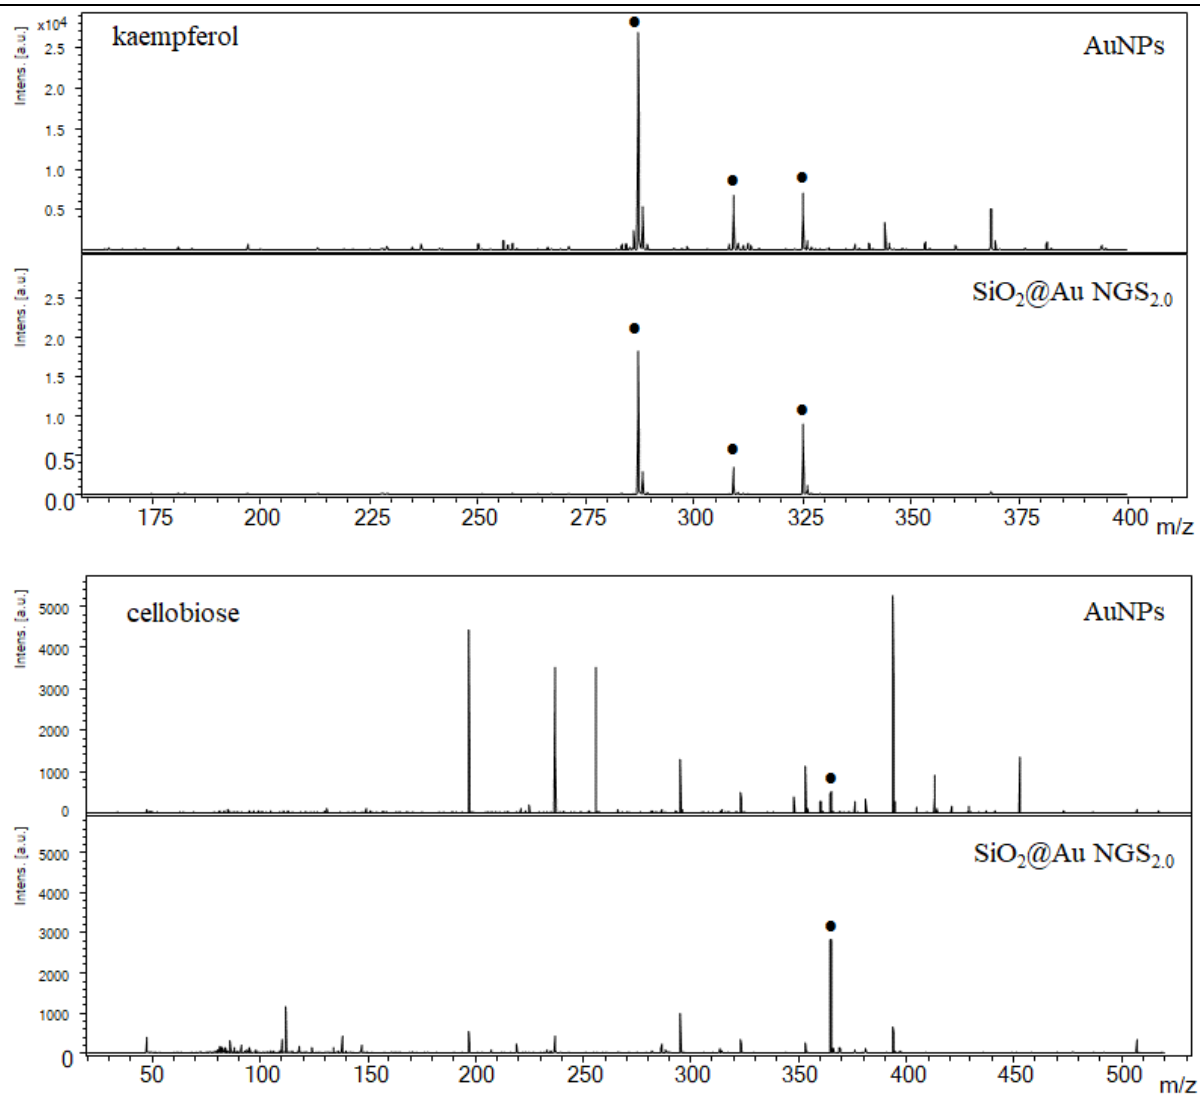

**Figure S3.** Raw spectra with mass range to ~ 500 for Figure 6a (kaempferol) and Figure 6b (cellobiose). •: Analyte peak.

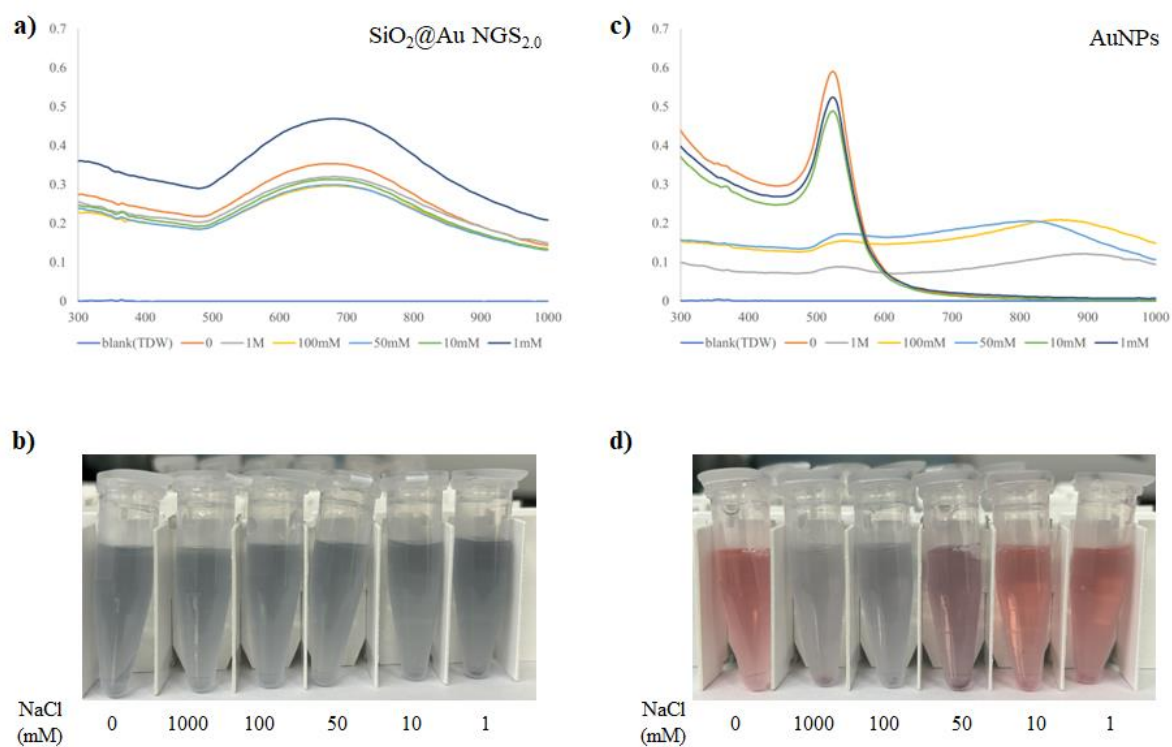

**Figure S4.** Comparison of colloidal stability in NaCl solutions between  $\text{SiO}_2@\text{Au NGS}_{2.0}$  and AuNPs. Uv/vis spectra (a) and optical photograph (b) of  $\text{SiO}_2@\text{Au NGS}_{2.0}$  showed their excellent colloidal stability, however AuNPs lost their stability at 50 mM or higher salt concentrations (c, d).

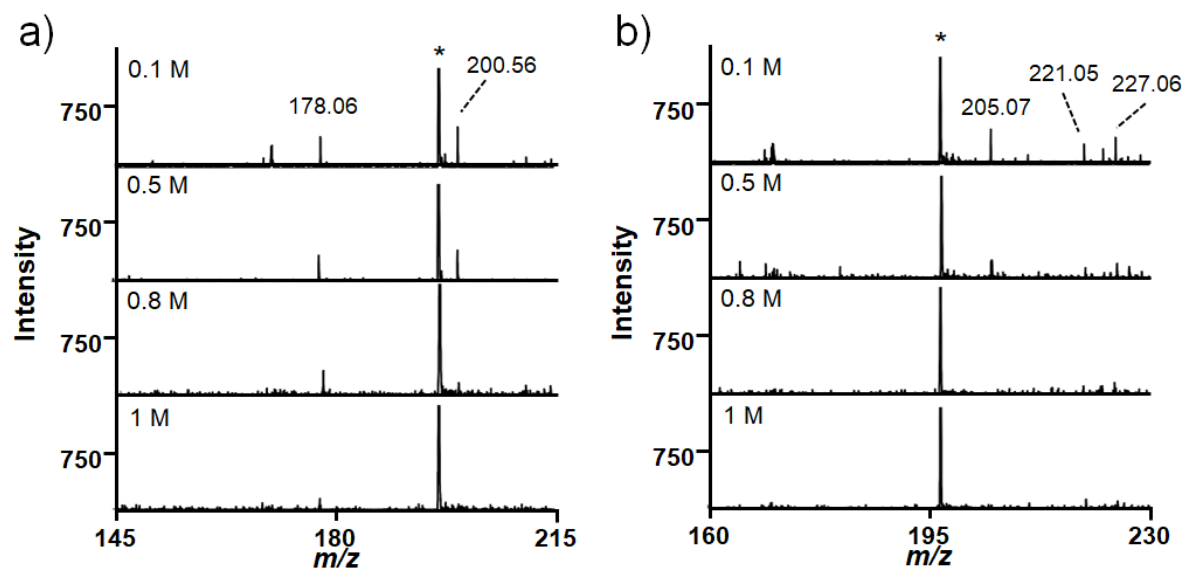

**Figure S5.** Salt tolerance of the AuNP matrix in NaCl solutions of various concentrations. (a) Histidine ( $m/z$  = 178.06,  $[M+Na]^+$  and  $m/z$  = 200.56,  $[M+2Na-H]^+$ ). (b) Mannitol ( $m/z$  = 205.07,  $[M+Na]^+$ ;  $m/z$  = 221.05,  $[M+K]^+$ ; and  $m/z$  = 227.06,  $[M+2Na-H]^+$ ). \*: gold

**Table S1.** Detailed peak assignments for mass spectra in Fig. 2.**a. Serine**

|                           |            | <b>0</b> | <b>0.5</b> | <b>1.0</b> | <b>1.5</b> | <b>2.0</b> |
|---------------------------|------------|----------|------------|------------|------------|------------|
| <b>[M+H]<sup>+</sup></b>  | m/z        |          |            |            | 105.947    | 105.960    |
|                           | Intensity  |          |            |            | 103.99     | 228.63     |
|                           | S/N        |          |            |            | 24.8       | 52.2       |
|                           | Resolution |          |            |            | 3419       | 3616       |
| <b>[M+Na]<sup>+</sup></b> | m/z        |          | 127.953    | 127.960    | 127.953    | 127.970    |
|                           | Intensity  |          | 77.15      | 135.46     | 137.66     | 540.94     |
|                           | S/N        |          | 19.9       | 33.9       | 33.8       | 126.3      |
|                           | Resolution |          | 5806       | 5154       | 3804       | 4143       |
| <b>[M+K]<sup>+</sup></b>  | m/z        |          | 143.940    | 143.951    | 143.941    | 143.95     |
|                           | Intensity  |          | 31.20      | 50.62      | 46.75      | 151.88     |
|                           | S/N        |          | 8.0        | 13.7       | 11.6       | 37.3       |
|                           | Resolution |          | 6589       | 5722       | 5664       | 4832       |

**b. Mannitol**

|                           |            | <b>0</b> | <b>0.5</b> | <b>1.0</b> | <b>1.5</b> | <b>2.0</b> |
|---------------------------|------------|----------|------------|------------|------------|------------|
| <b>[M+H]<sup>+</sup></b>  | m/z        |          |            |            |            |            |
|                           | Intensity  |          |            |            |            |            |
|                           | S/N        |          |            |            |            |            |
|                           | Resolution |          |            |            |            |            |
| <b>[M+Na]<sup>+</sup></b> | m/z        |          |            | 205.138    | 205.126    | 205.083    |
|                           | Intensity  |          |            | 153.56     | 90.21      | 2259.55    |
|                           | S/N        |          |            | 36.3       | 18.5       | 385.0      |
|                           | Resolution |          |            | 3955       | 2063       | 5166       |
| <b>[M+K]<sup>+</sup></b>  | m/z        |          |            |            | 221.112    | 221.056    |
|                           | Intensity  |          |            |            | 42.29      | 1003.41    |
|                           | S/N        |          |            |            | 8.8        | 181.9      |
|                           | Resolution |          |            |            | 2534       | 4758       |

**c. quercetin**

|                           |            | <b>0</b> | <b>0.5</b> | <b>1.0</b> | <b>1.5</b> | <b>2.0</b> |
|---------------------------|------------|----------|------------|------------|------------|------------|
| <b>[M+H]<sup>+</sup></b>  | m/z        | 303.178  | 303.086    | 303.097    | 303.096    | 303.104    |
|                           | Intensity  | 7849.84  | 4640.69    | 1378.87    | 2187.50    | 2442.22    |
|                           | S/N        | 942.2    | 912.8      | 219.5      | 413.0      | 468.5      |
|                           | Resolution | 1943     | 3422       | 4571       | 3534       | 3088       |
| <b>[M+Na]<sup>+</sup></b> | m/z        | 325.112  | 325.050    | 325.064    | 325.059    | 325.064    |
|                           | Intensity  | 108.22   | 277.99     | 280.27     | 248.51     | 245.79     |
|                           | S/N        | 12.0     | 52.1       | 44.5       | 47.6       | 46.7       |
|                           | Resolution | 7324     | 6742       | 5079       | 4402       | 3897       |
| <b>[M+K]<sup>+</sup></b>  | m/z        | 341.118  | 341.050    | 341.064    | 341.061    | 341.074    |
|                           | Intensity  | 408.70   | 176.34     | 5157.73    | 1175.17    | 1389.15    |

|  |            |      |      |       |       |       |
|--|------------|------|------|-------|-------|-------|
|  | S/N        | 49.2 | 34.8 | 850.1 | 225.4 | 269.7 |
|  | Resolution | 5184 | 5275 | 4187  | 4200  | 3082  |

d. penta(ethylene glycol)

|                     |            | 0 | 0.5     | 1.0     | 1.5     | 2.0     |
|---------------------|------------|---|---------|---------|---------|---------|
| [M+H] <sup>+</sup>  | m/z        |   |         |         |         |         |
|                     | Intensity  |   |         |         |         |         |
|                     | S/N        |   |         |         |         |         |
|                     | Resolution |   |         |         |         |         |
| [M+Na] <sup>+</sup> | m/z        |   | 261.393 | 261.303 | 261.337 | 261.345 |
|                     | Intensity  |   | 66.88   | 1613.38 | 889.41  | 9112.91 |
|                     | S/N        |   | 18.9    | 387.7   | 215.4   | 2935.6  |
|                     | Resolution |   | 4935    | 2935    | 2460    | 1913    |
| [M+K] <sup>+</sup>  | m/z        |   | 277.386 | 277.397 | 277.326 | 277.327 |
|                     | Intensity  |   | 38.49   | 889.03  | 429.51  | 4166.70 |
|                     | S/N        |   | 11.2    | 209.9   | 103.5   | 2052.1  |
|                     | Resolution |   | 5468    | 3870    | 2778    | 1881    |

**Table S2.** Detailed peak assignments for mass spectra in Fig. 3.

| Analyte               |                        | [M+H] <sup>+</sup> | [M+Na] <sup>+</sup> | [M+K] <sup>+</sup> |
|-----------------------|------------------------|--------------------|---------------------|--------------------|
| Aspartic acid         | Aspartic acid          | m/z                | 133.924             | 155.915            |
|                       |                        | Intensity          | 93.68               | 893.81             |
|                       |                        | S/N                | 91.8                | 190.6              |
|                       |                        | Resolution         | 4455                | 4006               |
|                       | Glutamic acid          | m/z                | 147.982             | 169.973            |
|                       |                        | Intensity          | 2064.82             | 149.77             |
|                       |                        | S/N                | 489.9               | 37.7               |
|                       |                        | Resolution         | 3759                | 5969               |
|                       | Glutamine              | m/z                | 146.975             | 168.969            |
|                       |                        | Intensity          | 343.0               | 1776.5             |
|                       |                        | S/N                | 69.8                | 330.7              |
|                       |                        | Resolution         | 4380                | 4278               |
| Oligo Ethylene Glycol | Tri(ethylene glycol)   | m/z                | 151.059             | 173.201            |
|                       |                        | Intensity          | 129.09              | 3139.80            |
|                       |                        | S/N                | 29.09               | 705.2              |
|                       |                        | Resolution         | 4604                | 3651               |
|                       | tetra(ethylene glycol) | m/z                |                     | 217.316            |
|                       |                        | Intensity          |                     | 4850.78            |
|                       |                        | S/N                |                     | 1105.8             |
|                       |                        | Resolution         |                     | 4878               |
| sugar                 | Mannitol               | m/z                |                     | 205.083            |
|                       |                        | Intensity          |                     | 2259.55            |
|                       |                        | S/N                |                     | 385.0              |
|                       |                        | Resolution         |                     | 5166               |
|                       | Galactose              | m/z                |                     | 203.079            |
|                       |                        | Intensity          |                     | 2580.23            |
|                       |                        | S/N                |                     | 431.4              |
|                       |                        | Resolution         |                     | 4796               |
| Flavonoid             | Quercetin              | m/z                | 303.096             | 325.059            |
|                       |                        | Intensity          | 2187.50             | 248.51             |
|                       |                        | S/N                | 413.0               | 47.6               |
|                       |                        | Resolution         | 3534                | 4402               |
|                       | kaempferol             | m/z                | 287.092             | 309.046            |
|                       |                        | Intensity          | 17905.57            | 3220.18            |
|                       |                        | S/N                | 2256.9              | 382.8              |
|                       |                        | Resolution         | 1706                | 2858               |



**Table S3.** Detailed peak assignments for mass spectra in Fig. 4.

| Mixed analyte               |                        | [M+H] <sup>+</sup> | [M+Na] <sup>+</sup> | [M+K] <sup>+</sup> |
|-----------------------------|------------------------|--------------------|---------------------|--------------------|
| Mixed Amino Acid            | Glutamine              | m/z                |                     | 169.044            |
|                             |                        | Intensity          |                     | 76.85              |
|                             |                        | S/N                |                     | 18.3               |
|                             |                        | Resolution         |                     | 3863               |
|                             | Histidine              | m/z                | 156.054             | 178.063            |
|                             |                        | Intensity          | 117.43              | 257.97             |
|                             |                        | S/N                | 28.1                | 59.2               |
|                             |                        | Resolution         | 3570                | 3664               |
|                             | Arginine               | m/z                | 175.116             |                    |
|                             |                        | Intensity          | 416.62              |                    |
|                             |                        | S/N                | 98.6                |                    |
|                             |                        | Resolution         | 3021                |                    |
| Mixed Oligo Ethylene Glycol | Tri(ethylene glycol)   | m/z                |                     | 173.097            |
|                             |                        | Intensity          |                     | 805.15             |
|                             |                        | S/N                |                     | 118.9              |
|                             |                        | Resolution         |                     | 4200               |
|                             | Tetra(ethylene glycol) | m/z                |                     | 217.172            |
|                             |                        | Intensity          |                     | 2641.89            |
|                             |                        | S/N                |                     | 451.5              |
|                             |                        | Resolution         |                     | 4223               |
|                             | Penta(ethylene glycol) | m/z                |                     | 261.236            |
|                             |                        | Intensity          |                     | 3291.96            |
|                             |                        | S/N                |                     | 573.4              |
|                             |                        | Resolution         |                     | 4503               |
| Mixed Sugar                 | Galactose              | m/z                | 180.830             | 202.982            |
|                             |                        | Intensity          | 81.30               | 345.46             |
|                             |                        | S/N                | 22.1                | 95.7               |
|                             |                        | Resolution         | 3067                | 4651               |
|                             | Mannitol               | m/z                |                     | 205.007            |
|                             |                        | Intensity          |                     | 805.28             |
|                             |                        | S/N                |                     | 220.7              |
|                             |                        | Resolution         |                     | 4118               |
|                             | Cellobiose             | m/z                |                     | 365.068            |
|                             |                        |                    |                     |                    |

|                               |            |            |         |         |
|-------------------------------|------------|------------|---------|---------|
| Mixed<br>Small mole-<br>cules |            | Intensity  | 1289.41 |         |
|                               |            | S/N        | 378.7   |         |
|                               |            | Resolution | 4736    |         |
|                               |            | m/z        | 226.998 |         |
|                               | Tryptophan | Intensity  | 151.15  |         |
|                               |            | S/N        | 39.3    |         |
|                               |            | Resolution | 7742    |         |
|                               |            | m/z        | 302.994 | 340.942 |
|                               | Quercetin  | Intensity  | 719.32  | 344.31  |
|                               |            | S/N        | 187.4   | 82.4    |
|                               |            | Resolution | 7448    | 7753    |
|                               |            | m/z        | 365.049 |         |
|                               | Cellobiose | Intensity  | 2182.82 |         |
|                               |            | S/N        | 528.8   |         |
|                               |            | Resolution | 4835    |         |

**Table S4.** Detailed peak assignments for mass spectra in Fig. 6.

a. Kaempferol

|                     |            | AuNPs    | GO       | SiO <sub>2</sub> @AuNGS <sub>2.0</sub> |
|---------------------|------------|----------|----------|----------------------------------------|
| [M+H] <sup>+</sup>  | m/z        | 287.106  | 287.147  | 287.092                                |
|                     | Intensity  | 28067.01 | 38384.14 | 17905.57                               |
|                     | S/N        | 3670.0   | 89.2     | 2256.9                                 |
|                     | Resolution | 1553     | 703      | 1706                                   |
| [M+Na] <sup>+</sup> | m/z        | 309.068  | 309.123  | 309.046                                |
|                     | Intensity  | 6369.35  | 22250.95 | 3220.17                                |
|                     | S/N        | 771.2    | 59.0     | 382.8                                  |
|                     | Resolution | 2290     | 658      | 2858                                   |
| [M+K] <sup>+</sup>  | m/z        | 325.075  | 325.443  | 325.083                                |
|                     | Intensity  | 6445.01  | 41243.15 | 7918.13                                |
|                     | S/N        | 790.7    | 140.2    | 971.0                                  |
|                     | Resolution | 2512     | 176      | 1930                                   |

b. Cellobiose

|                     |            | AuNPs   | GO | SiO <sub>2</sub> @AuNGS <sub>2.0</sub> |
|---------------------|------------|---------|----|----------------------------------------|
| [M+H] <sup>+</sup>  | m/z        |         |    |                                        |
|                     | Intensity  |         |    |                                        |
|                     | S/N        |         |    |                                        |
|                     | Resolution |         |    |                                        |
| [M+Na] <sup>+</sup> | m/z        | 365.190 |    | 365.177                                |
|                     | Intensity  | 468.55  |    | 2591.05                                |
|                     | S/N        | 79.8    |    | 447.1                                  |
|                     | Resolution | 5192    |    | 6107                                   |
| [M+K] <sup>+</sup>  | m/z        |         |    |                                        |
|                     | Intensity  |         |    |                                        |
|                     | S/N        |         |    |                                        |
|                     | Resolution |         |    |                                        |

c. Triethylene glycol

|                     |            | AuNPs    | GO      | SiO <sub>2</sub> @AuNGS <sub>2.0</sub> |
|---------------------|------------|----------|---------|----------------------------------------|
| [M+H] <sup>+</sup>  | m/z        |          |         |                                        |
|                     | Intensity  |          |         |                                        |
|                     | S/N        |          |         |                                        |
|                     | Resolution |          |         |                                        |
| [M+Na] <sup>+</sup> | m/z        | 172.990  | 173.039 | 173.005                                |
|                     | Intensity  | 10682.83 | 5769.76 | 21722.19                               |
|                     | S/N        | 75.3     | 14.4    | 3577.1                                 |
|                     | Resolution | 690      | 1042    | 1005                                   |
| [M+K] <sup>+</sup>  | m/z        | 188.983  | 189.007 | 188.997                                |

|            |         |         |          |
|------------|---------|---------|----------|
| Intensity  | 8145.66 | 7272.58 | 15184.33 |
| S/N        | 51.0    | 18.7    | 2431.5   |
| Resolution | 827     | 890     | 1124     |

d. Serine

|                     |            | AuNPs   | GO | SiO <sub>2</sub> @AuNGS <sub>2.0</sub> |
|---------------------|------------|---------|----|----------------------------------------|
| [M+H] <sup>+</sup>  | m/z        |         |    | 105.953                                |
|                     | Intensity  |         |    | 200.58                                 |
|                     | S/N        |         |    | 43.1                                   |
|                     | Resolution |         |    | 4243                                   |
| [M+Na] <sup>+</sup> | m/z        | 127.927 |    | 127.959                                |
|                     | Intensity  | 171.93  |    | 322.08                                 |
|                     | S/N        | 28.3    |    | 67.0                                   |
|                     | Resolution | 1416    |    | 4592                                   |
| [M+K] <sup>+</sup>  | m/z        | 143.910 |    | 143.946                                |
|                     | Intensity  | 92.02   |    | 165.96                                 |
|                     | S/N        | 16.1    |    | 35.9                                   |
|                     | Resolution | 2084    |    | 4862                                   |
